# Supplementary material for: DPHL: A DIA Pan-human Protein Mass Spectrometry Library for Robust Biomarker Discovery
Source: PubMed Central journal article supplement (PMC7646093; doi:10.1016/j.gpb.2019.11.008), 2020-08-12

**A** Cumulative transition group counts in DPHL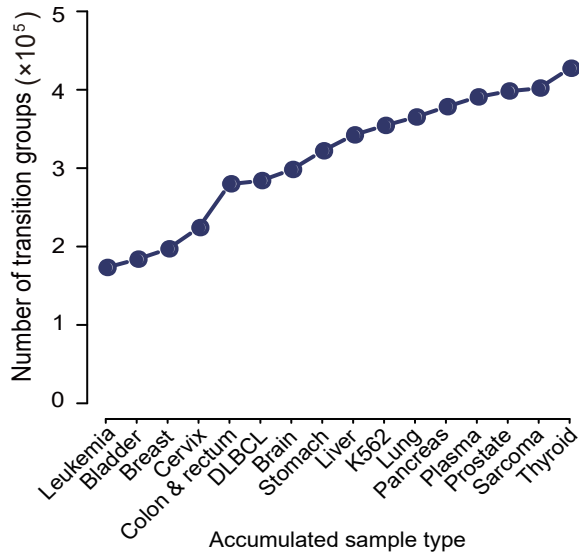**B** Cumulative protein counts in DPHL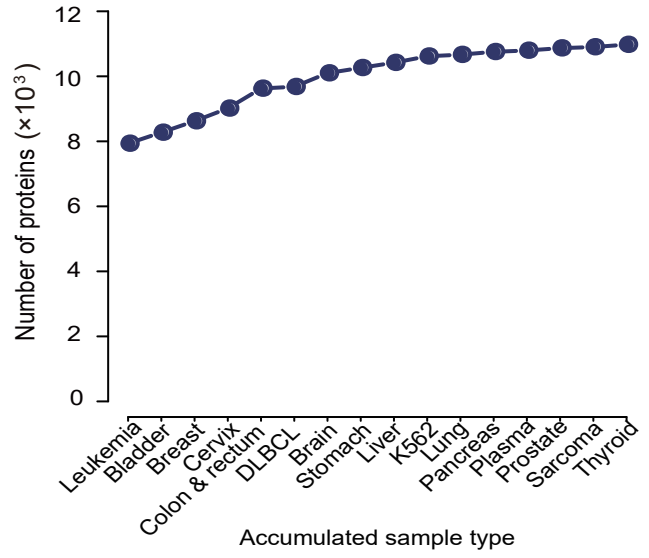**C** Cumulative transition group and protein counts from pancreatic samples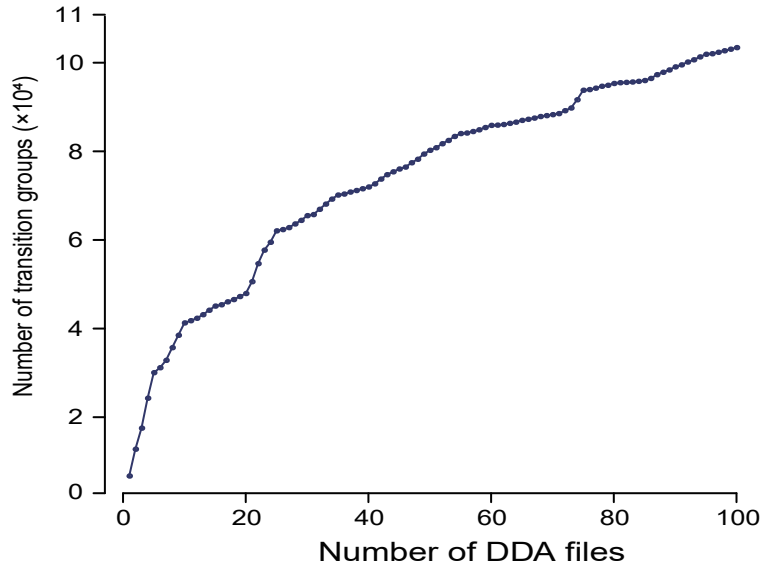**D** Cumulative transition group and protein counts from plasma samples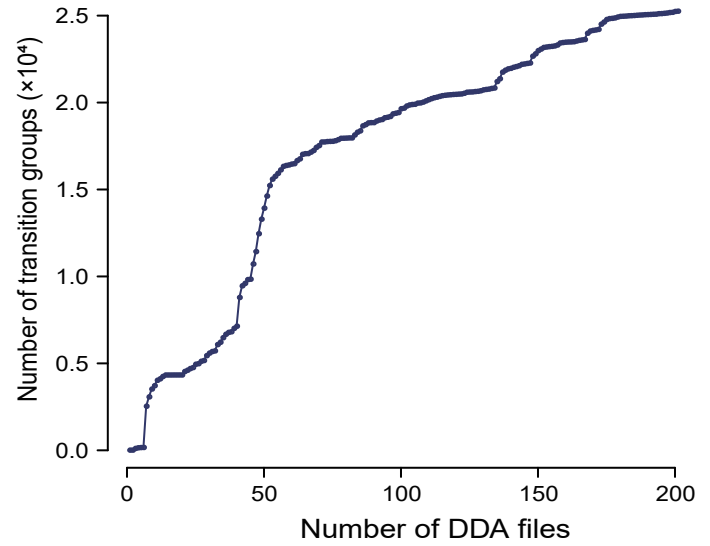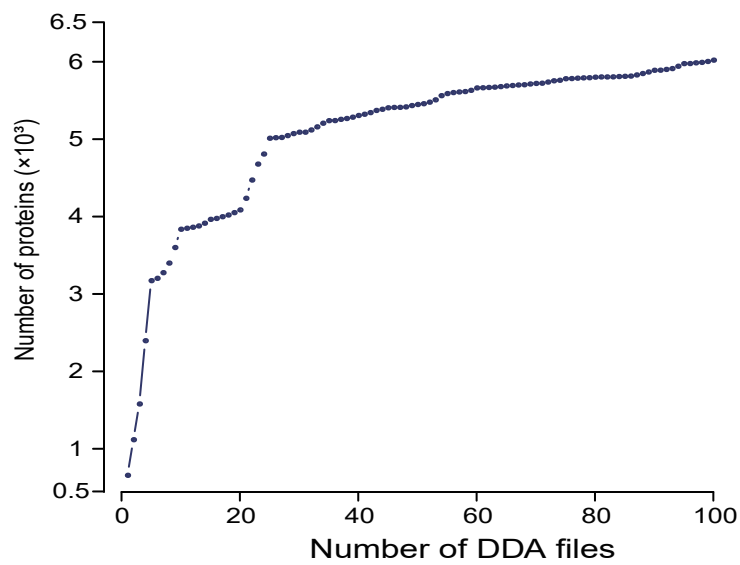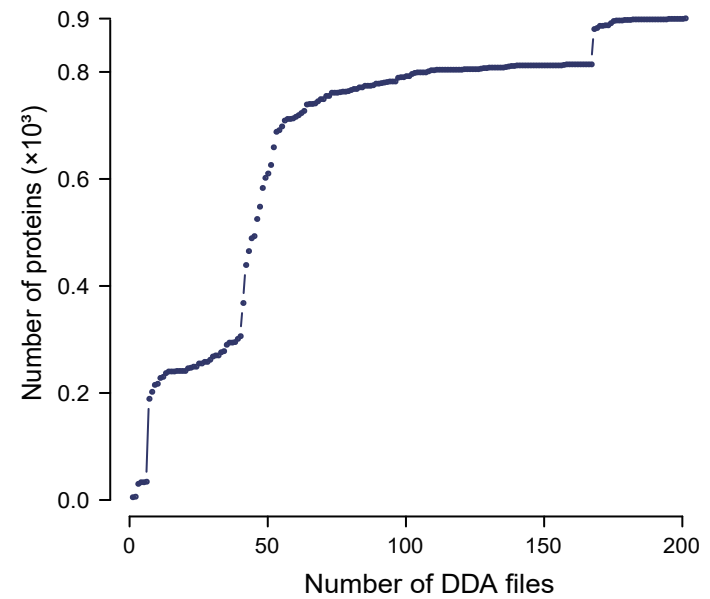

Supplement: mmc2.pdf [file mmc2.pdf]
