# Supplementary material for: DPHL: A DIA Pan-human Protein Mass Spectrometry Library for Robust Biomarker Discovery
Source: PubMed Central journal article supplement (PMC7646093; doi:10.1016/j.gpb.2019.11.008), 2020-08-12

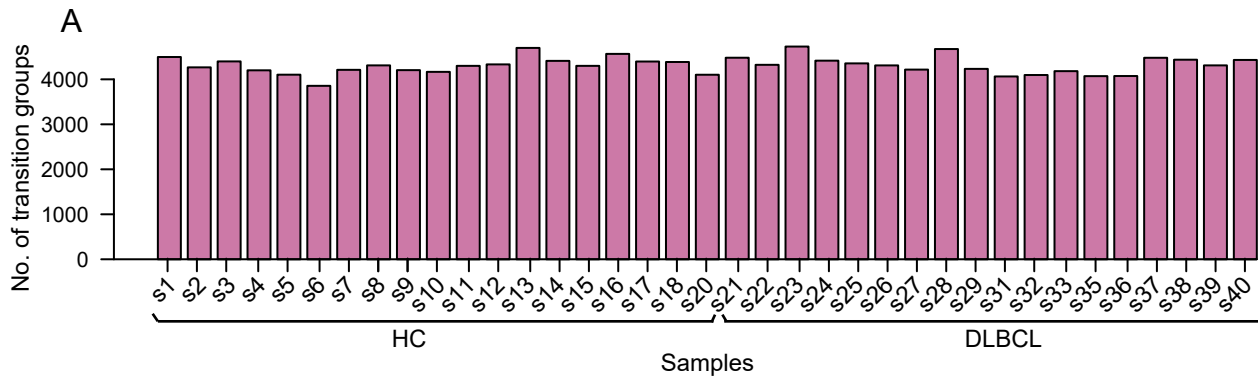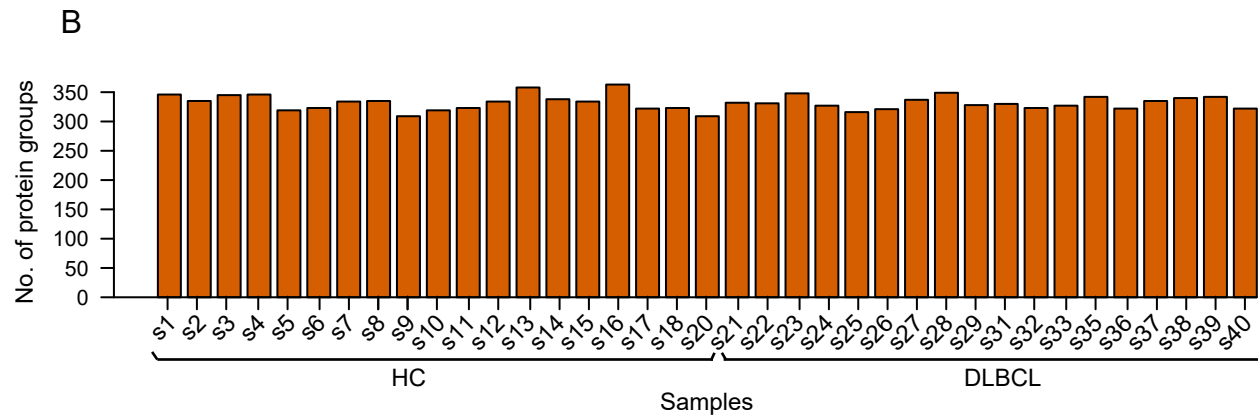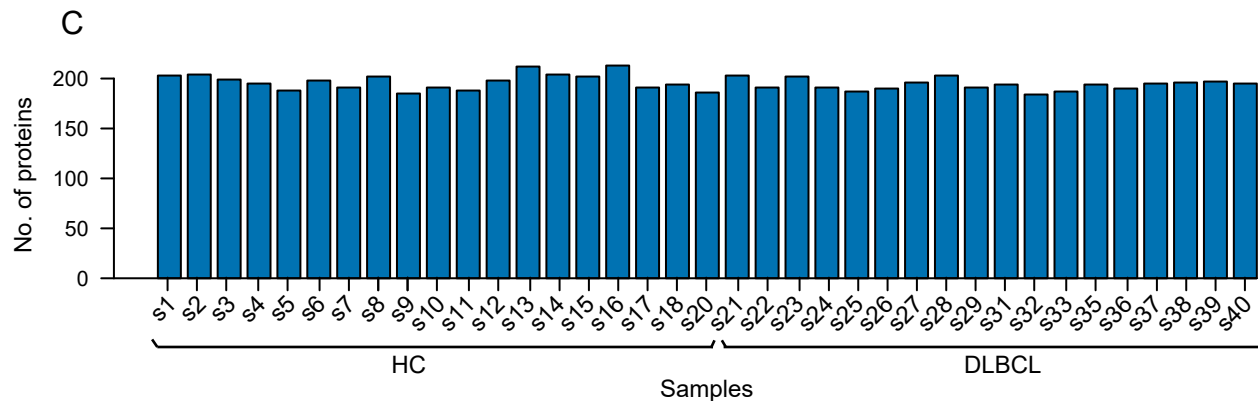

Supplement: mmc7.pdf [file mmc7.pdf]
