# Supplementary material for: DPHL: A DIA Pan-human Protein Mass Spectrometry Library for Robust Biomarker Discovery
Source: PubMed Central journal article supplement (PMC7646093; doi:10.1016/j.gpb.2019.11.008), 2020-08-12

P02741, CRP (ESDTSYVSLK)

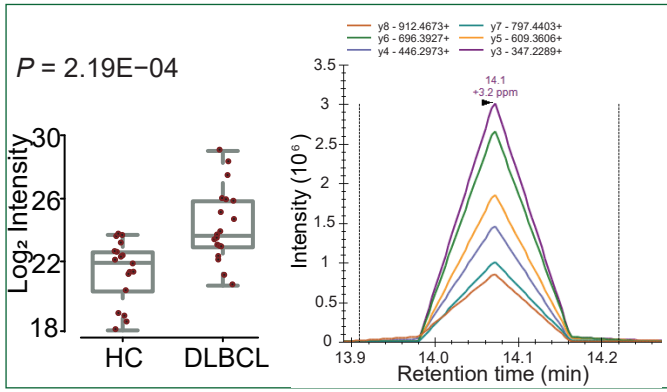

P02741, CRP (RQDNEILIFWSK)

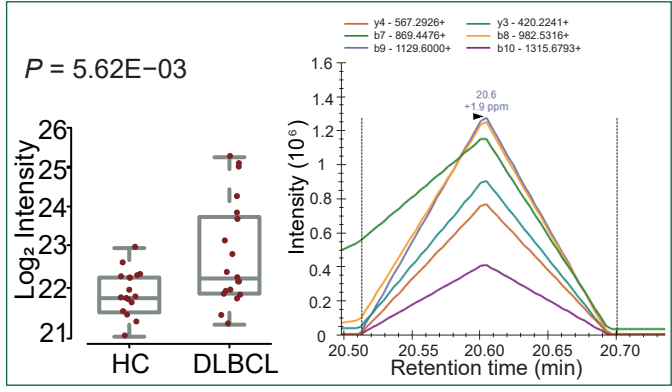

P0DJ18, SAA1 (FFGHAEDSLADQAANEWGR)

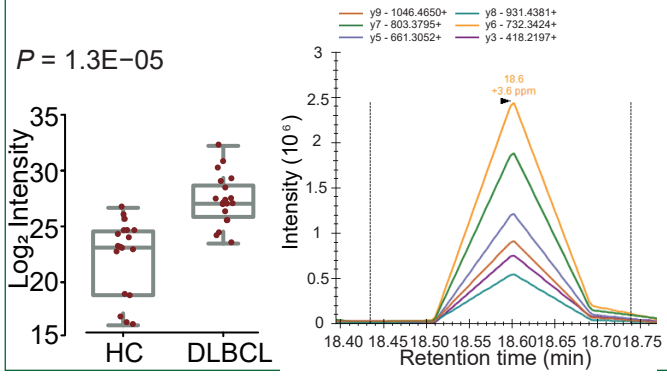

Supplement: mmc9.pdf [file mmc9.pdf]
