# Supplementary material for: DPHL: A DIA Pan-human Protein Mass Spectrometry Library for Robust Biomarker Discovery
Source: PubMed Central journal article supplement (PMC7646093; doi:10.1016/j.gpb.2019.11.008), 2020-08-12

### A XIC peak areas of precursor ions at MS1 level

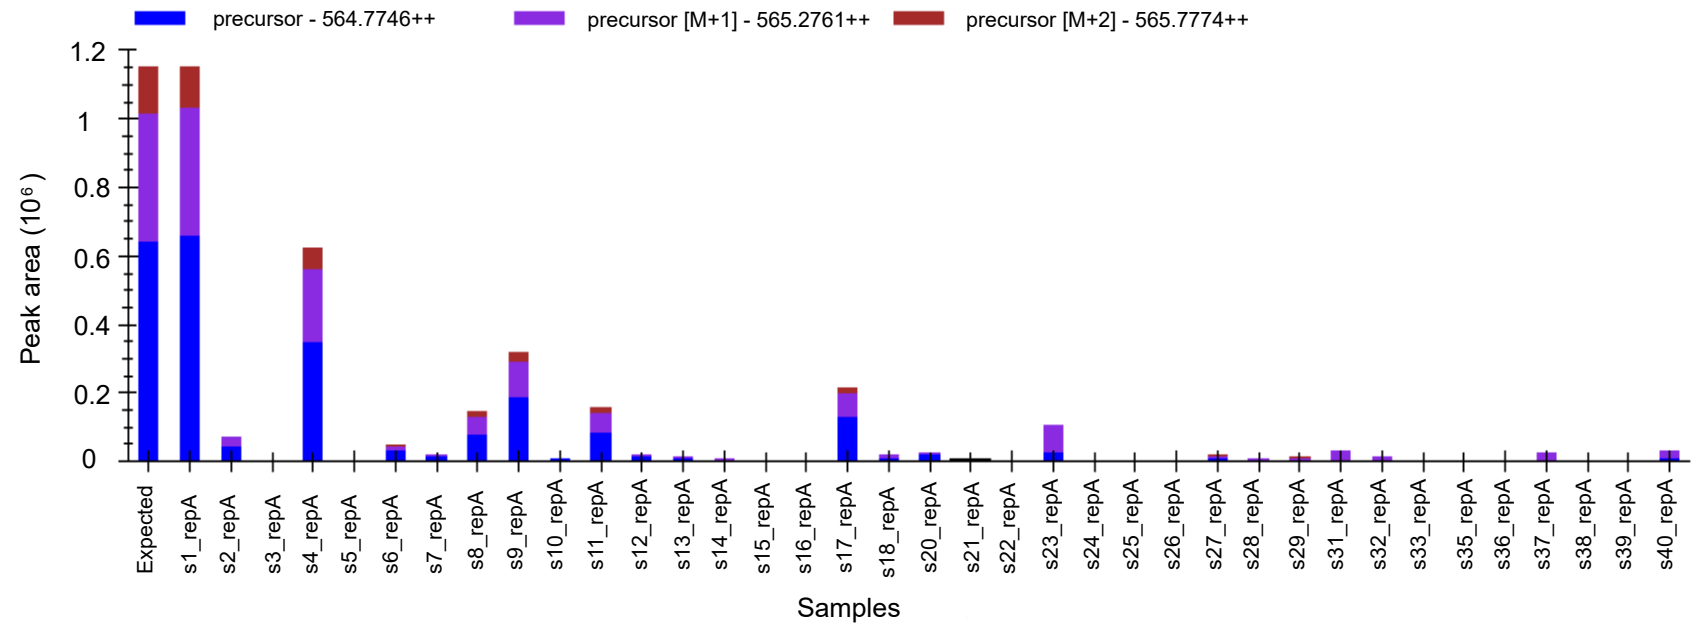

### B XIC peak areas of fragment ions at MS2 level

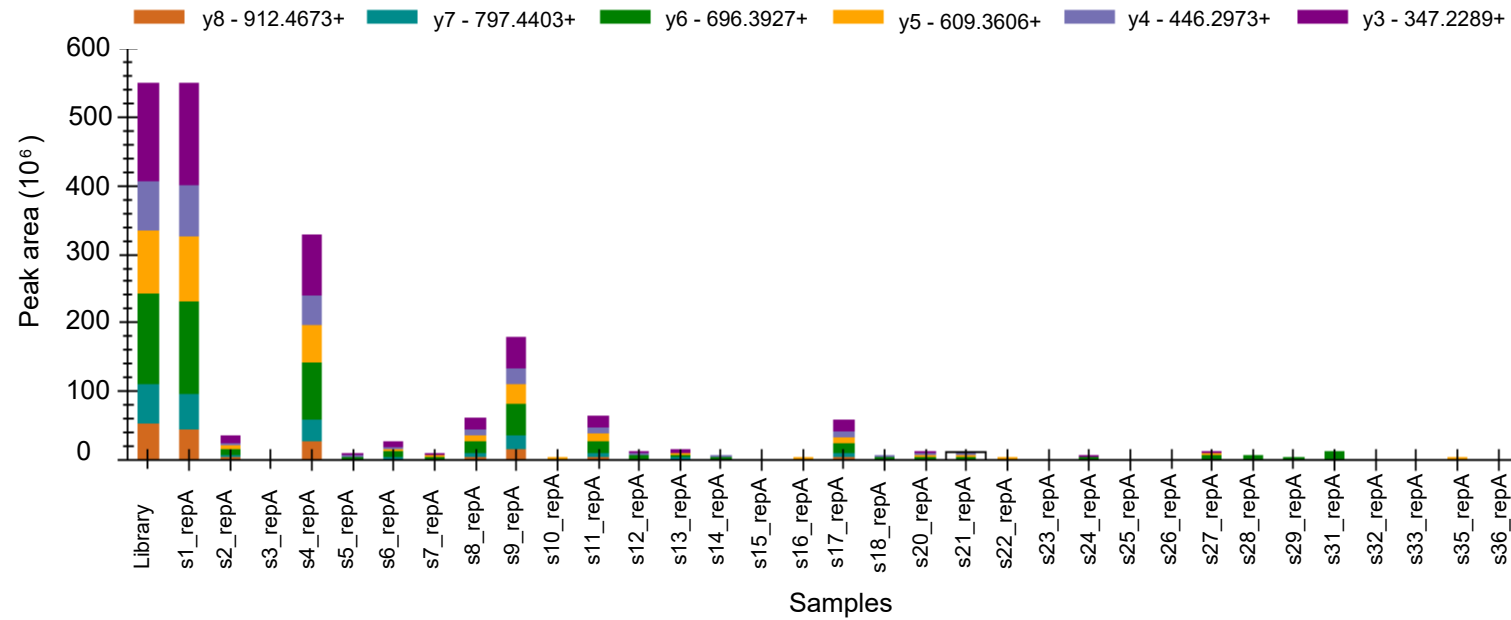

Supplement: mmc10.pdf [file mmc10.pdf]
